# Supplementary material for: Heterologous perylene diimide arrays: potential non-fullerene acceptors in organic solar cells
Source: Royal Society of Chemistry journal article supplement (doi:10.1039/c7tc03171h), 2017-01-01
Supplement: c7tc03171h1.pdf [file c7tc03171h1.pdf]

# **Heterologous Perylene Diimides Arrays: Potential Non-fullerene Acceptors in Organic Solar Cells**

Helin Wang, Lingcheng Chen\* and Yi Xiao\*

State Key Laboratory of Fine Chemicals, Dalian University of Technology, Dalian 116024,  
China

lcchen@dlut.edu.cn; xiaoyi@dlut.edu.cn

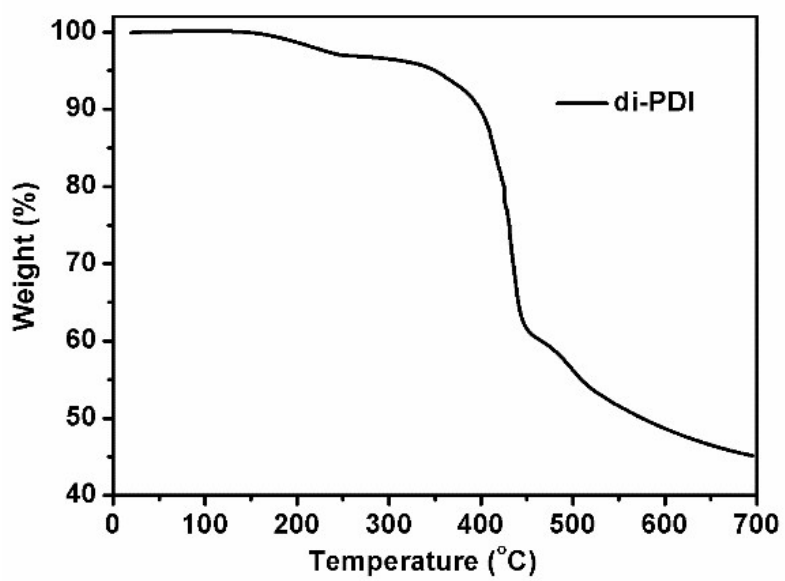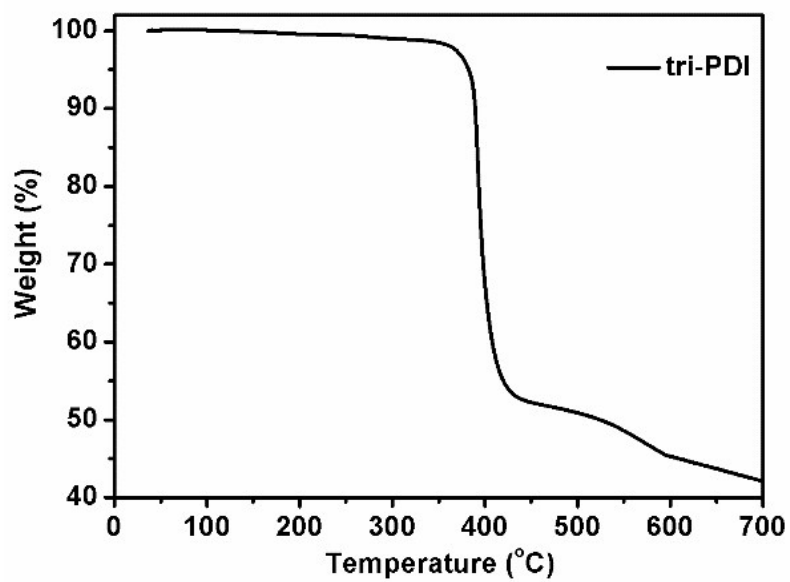

Fig. S1 TGA plots of **di-PDI** and **tri-PDI** (10 °C/min under N<sub>2</sub>).

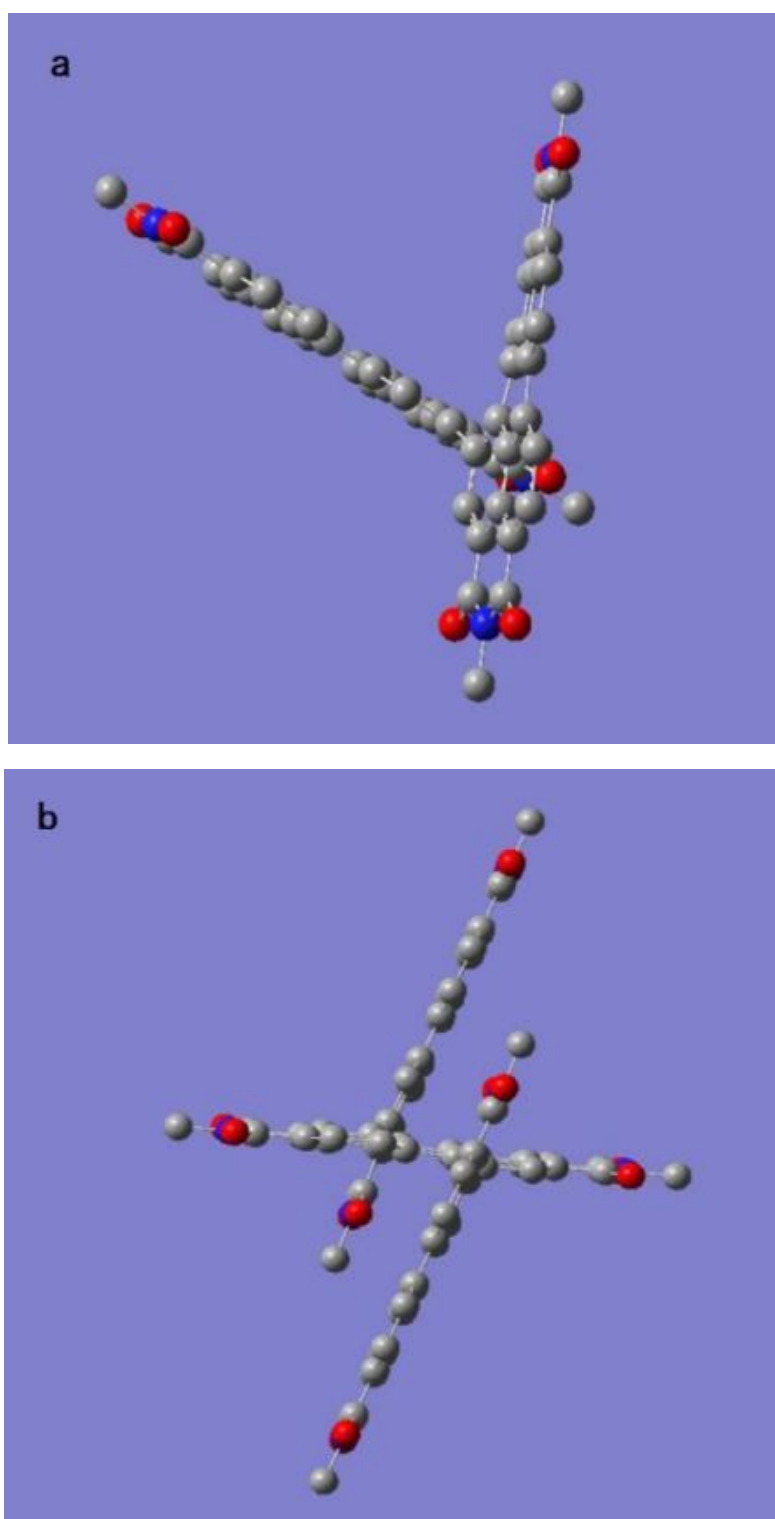

**Fig. S2** Ground-state geometries of **di-PDI** and **tri-PDI** calculated from DFT.

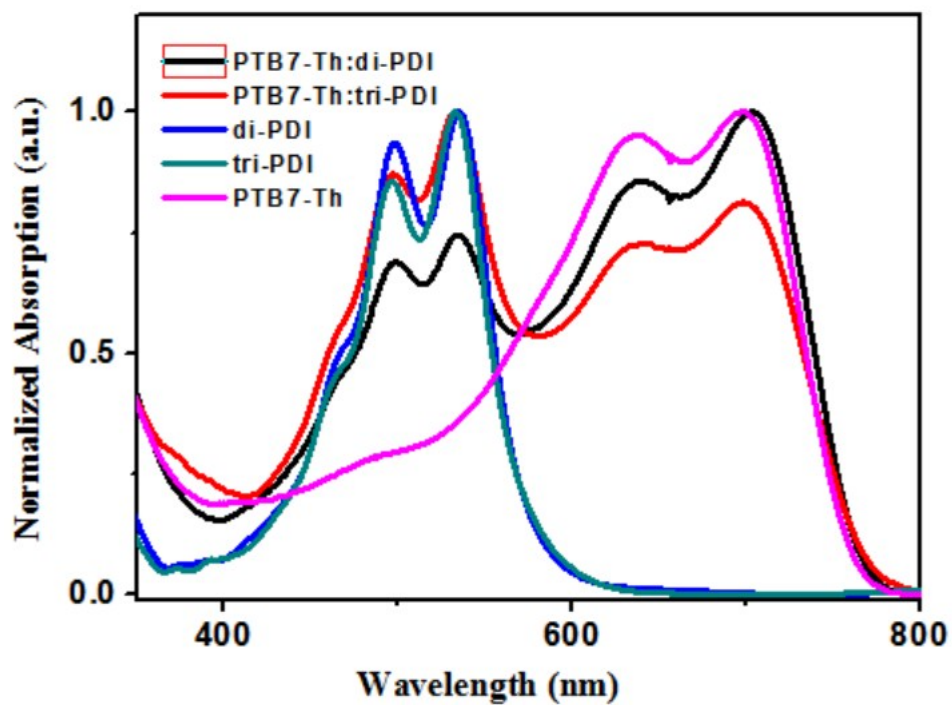

**Fig. S3** Normalized UV-vis absorption spectra of **di-PDI**, **tri-PDI**, **PTB7-Th**, and their blend films in solid state.

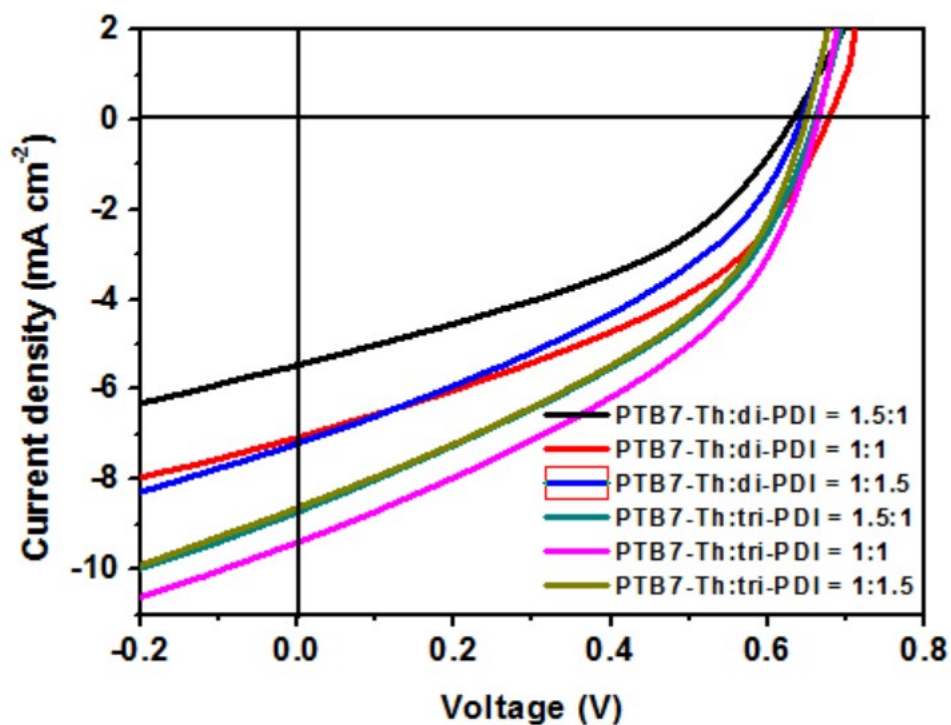

Fig. S4  $J$ - $V$  curves of PTB7-Th:tri-PDI (di-PDI) with different D/A ratios.

Table S1. Summary of device parameters of PTB7-Th:tri-PDI (di-PDI) with different D/A ratios.

| Blend films         | Ratio [wt/wt] | $J_{sc}$ [mA/cm <sup>2</sup> ] | $V_{oc}$ [V]        | FF [%]          | $PCE_{ave(max)}$ [%] |
|---------------------|---------------|--------------------------------|---------------------|-----------------|----------------------|
| PTB7-Th:<br>di-PDI  | 1.5:1         | 5.33±0.14 (5.46)               | 0.623±0.005 (0.628) | 39.9±0.4 (40.2) | 1.26 (1.38)          |
|                     | 1:1           | 6.96±0.12 (7.08)               | 0.669±0.003 (0.673) | 40.5±0.3 (40.8) | 1.81 (1.95)          |
|                     | 1:1.5         | 7.09±0.11 (7.20)               | 0.649±0.006 (0.655) | 36.7±0.5 (37.2) | 1.59 (1.74)          |
| PTB7-Th:<br>tri-PDI | 1.5:1         | 8.53±0.14 (8.67)               | 0.662±0.005 (0.667) | 38.9±0.2 (39.1) | 2.12 (2.26)          |
|                     | 1:1           | 9.24±0.12 (9.36)               | 0.659±0.002 (0.661) | 41.1±0.2 (41.2) | 2.41 (2.54)          |
|                     | 1:1.5         | 8.49±0.14 (8.63)               | 0.657±0.004 (0.661) | 38.7±0.5 (39.1) | 2.08 (2.23)          |

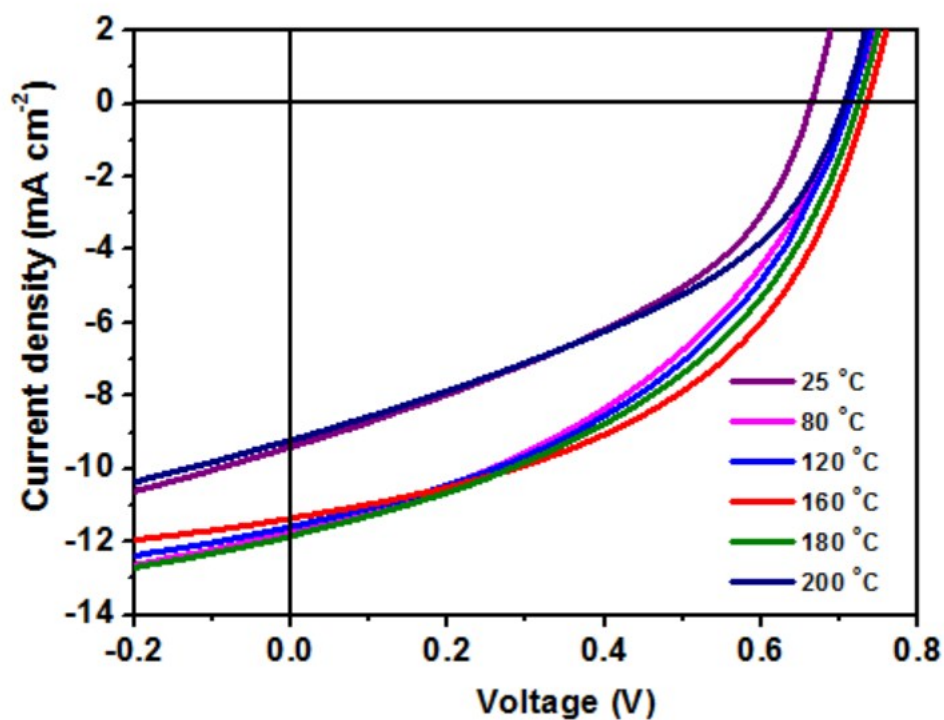

Fig. S5  $J$ - $V$  curves of PTB7-Th:tri-PDI (1:1) with different annealing temperature

Table S2. Summary of device parameters of PTB7-Th:tri-PDI (1:1) with different annealing temperature.

| Temp.<br>[°C] | $J_{SC}$<br>[mA/cm <sup>2</sup> ] | $V_{OC}$<br>[V]     | FF<br>[%]       | $PCE_{ave(max)}$<br>[%] |
|---------------|-----------------------------------|---------------------|-----------------|-------------------------|
| 25            | 9.24±0.12 (9.36)                  | 0.659±0.002 (0.661) | 41.1±0.2 (41.2) | 2.41 (2.54)             |
| 80            | 11.59±0.14 (11.73)                | 0.706±0.005 (0.711) | 40.8±0.4 (41.1) | 3.27 (3.42)             |
| 120           | 11.48±0.12 (11.59)                | 0.713±0.003 (0.716) | 42.4±0.4 (42.8) | 3.39 (3.55)             |
| 160           | 11.22±0.13 (11.35)                | 0.731±0.005 (0.735) | 46.9±0.3 (47.2) | 3.82 (3.94)             |
| 180           | 11.73±0.12 (11.84)                | 0.735±0.002 (0.737) | 42.1±0.4 (42.4) | 3.59 (3.70)             |
| 200           | 9.07±0.14 (9.21)                  | 0.716±0.005 (0.720) | 39.1±0.5 (39.4) | 2.48 (2.61)             |

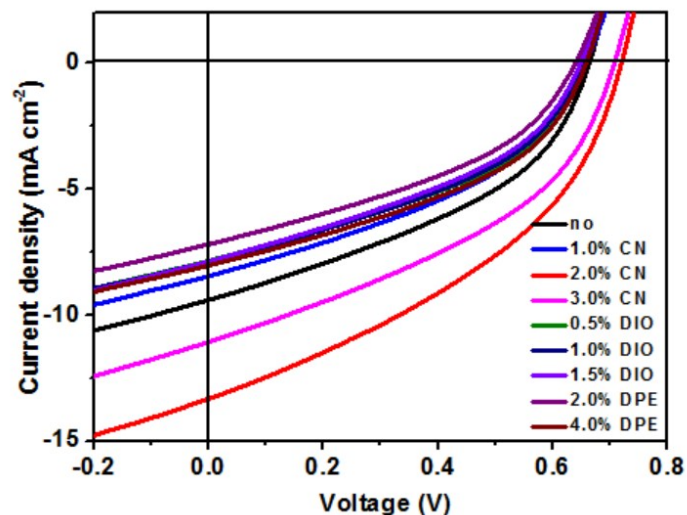

**Fig. S6**  $J$ - $V$  curves of PTB7-Th:tri-PDI (1:1) with different additives.

**Table S3.** Summary of device parameters of PTB7-Th:tri-PDI (1:1) with different additives.

| Additives<br>[volume] | $J_{sc}$<br>[mA/cm <sup>2</sup> ] | $V_{oc}$<br>[V]     | FF<br>[%]       | $PCE_{ave(max)}$<br>[%] |
|-----------------------|-----------------------------------|---------------------|-----------------|-------------------------|
| No                    | 9.24±0.12 (9.36)                  | 0.659±0.002 (0.661) | 41.1±0.2 (41.2) | 2.41 (2.54)             |
| 1.0% CN               | 8.38±0.13 (8.51)                  | 0.656±0.003 (0.659) | 39.1±0.5 (39.6) | 2.08 (2.22)             |
| 2.0% CN               | 13.28±0.13 (13.41)                | 0.709±0.004 (0.713) | 39.6±0.4 (40.0) | 3.70 (3.82)             |
| 3.0% CN               | 11.06±0.11 (11.16)                | 0.699±0.004 (0.703) | 40.2±0.3 (40.4) | 3.04 (3.17)             |
| 0.5% DIO              | 7.54±0.14 (7.68)                  | 0.652±0.004 (0.656) | 41.4±0.3 (41.7) | 2.01 (2.10)             |
| 1.0% DIO              | 7.58±0.14 (7.71)                  | 0.653±0.002 (0.655) | 40.8±0.4 (41.1) | 2.03 (2.07)             |
| 1.5% DIO              | 7.59±0.11 (7.70)                  | 0.651±0.005 (0.655) | 39.8±0.3 (40.1) | 1.89 (2.02)             |
| 2.0% DPE              | 7.03±0.13 (7.15)                  | 0.632±0.004 (0.633) | 39.9±0.2 (40.1) | 1.69 (1.81)             |
| 4.0% DPE              | 8.18±0.12 (8.30)                  | 0.658±0.002 (0.660) | 39.8±0.3 (40.0) | 2.07 (2.19)             |

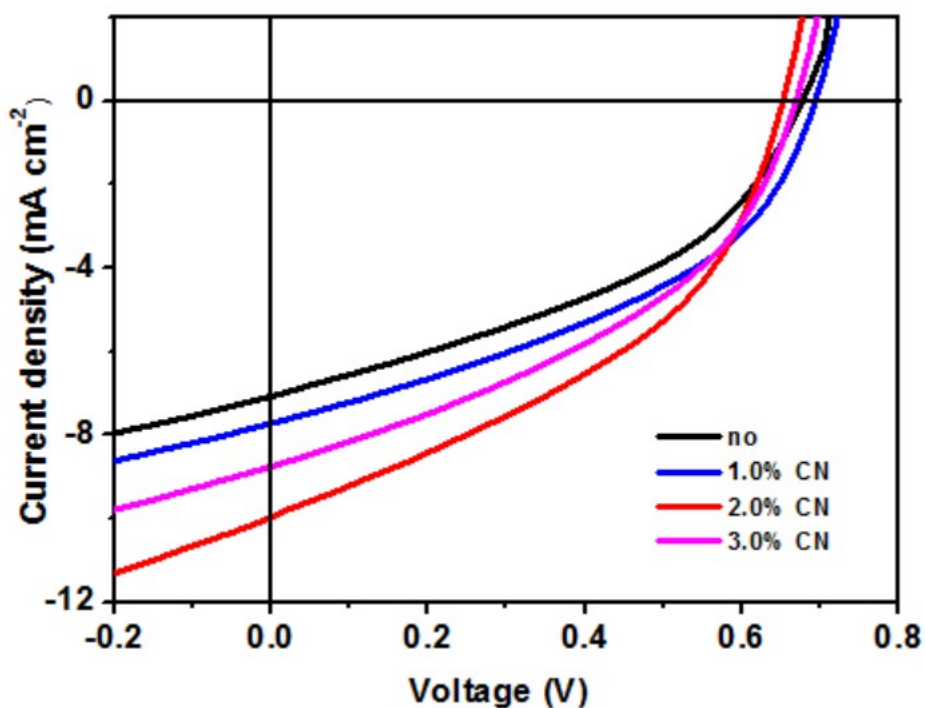

Fig. S7  $J$ - $V$  curves of PTB7-Th:di-PDI (1:1) with different CN concentrations.

TableS4. Summary of device parameters of PTB7-Th:di-PDI (1:1) with different CN concentrations.

| Additives<br>[volume] | $J_{SC}$<br>[mA/cm <sup>2</sup> ] | $V_{OC}$<br>[V]     | FF<br>[%]       | $PCE_{ave(max)}$<br>[%] |
|-----------------------|-----------------------------------|---------------------|-----------------|-------------------------|
| No                    | 6.96±0.12 (7.08)                  | 0.669±0.003 (0.673) | 40.5±0.3 (40.8) | 1.81 (1.95)             |
| 1.0% CN               | 7.57±0.15 (7.72)                  | 0.695±0.005 (0.700) | 40.8±0.3 (41.1) | 2.11 (2.22)             |
| 2.0% CN               | 9.85±0.13 (9.98)                  | 0.655±0.006 (0.661) | 40.4±0.2 (40.6) | 2.56 (2.68)             |
| 3.0% CN               | 8.65±0.11 (8.76)                  | 0.666±0.002 (0.668) | 40.3±0.4 (40.7) | 2.27 (2.38)             |



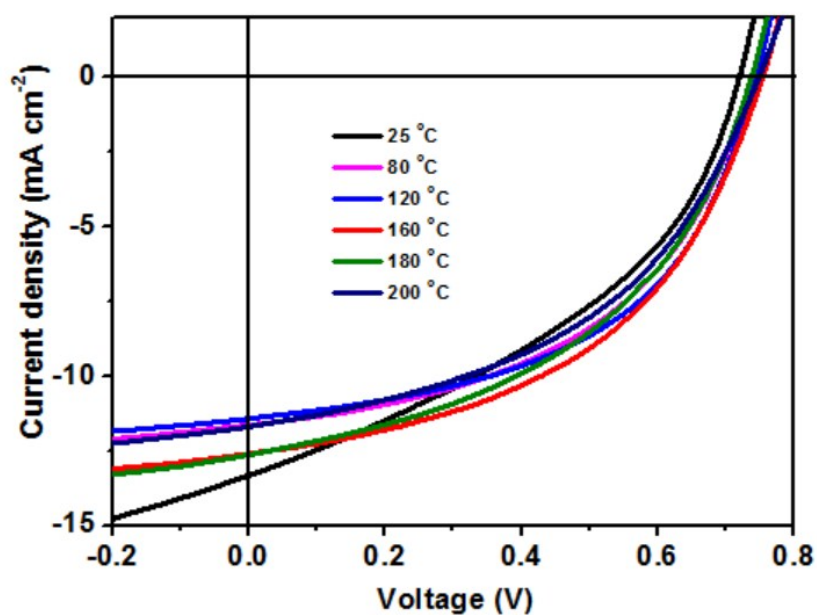

**Fig. S8**  $J$ - $V$  curves of PTB7-Th:tri-PDI (1:1) using 2.0% CN as additive with different annealing temperature.

**Table S5.** Summary of device parameters of PTB7-Th:tri-PDI (1:1) using 2.0% CN as additive with different annealing temperature.

| Temp.<br>[°C] | $J_{sc}$<br>[mA/cm <sup>2</sup> ] | $V_{oc}$<br>[V]     | FF<br>[%]       | $PCE_{ave(max)}$<br>[%] |
|---------------|-----------------------------------|---------------------|-----------------|-------------------------|
| 25            | 13.28±0.13 (13.41)                | 0.709±0.004 (0.713) | 39.6±0.4 (40.0) | 3.70 (3.82)             |
| 80            | 11.51±0.14 (11.64)                | 0.726±0.005 (0.731) | 49.2±0.2 (49.4) | 4.07 (4.20)             |
| 120           | 11.31±0.13 (11.43)                | 0.748±0.006 (0.754) | 50.4±0.2 (50.6) | 4.21 (4.36)             |
| 160           | 12.51±0.11 (12.61)                | 0.749±0.003 (0.751) | 47.8±0.3 (48.1) | 4.43 (4.55)             |
| 180           | 12.51±0.14 (12.64)                | 0.735±0.005 (0.740) | 45.2±0.5 (45.5) | 4.12 (4.26)             |
| 200           | 11.54±0.15 (11.69)                | 0.749±0.005 (0.754) | 45.5±0.2 (45.6) | 3.86 (4.02)             |

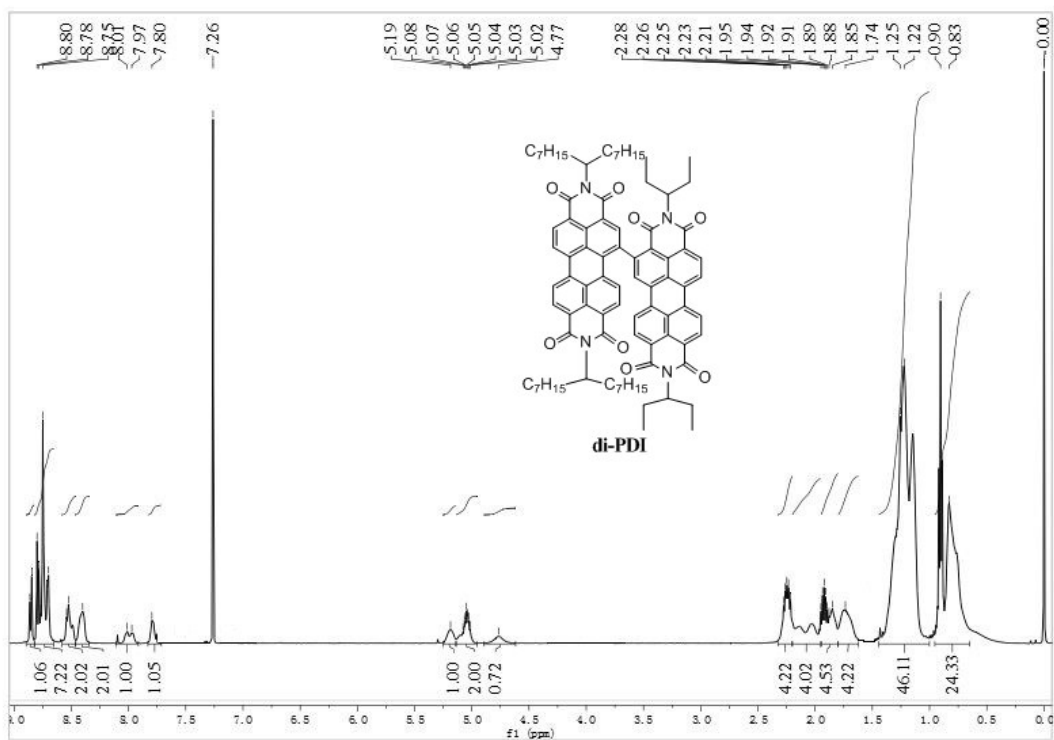

**Fig. S9** <sup>1</sup>H NMR spectrum of di-PDI in CDCl<sub>3</sub>.

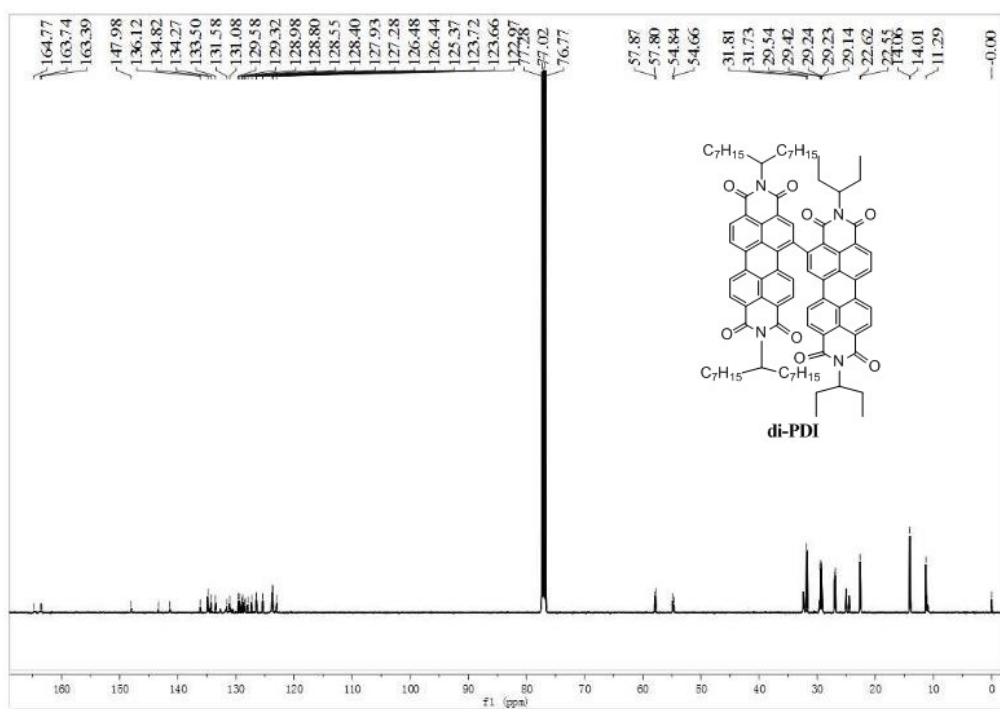

**Fig. S10** <sup>13</sup>C NMR spectrum of di-PDI in CDCl<sub>3</sub>.

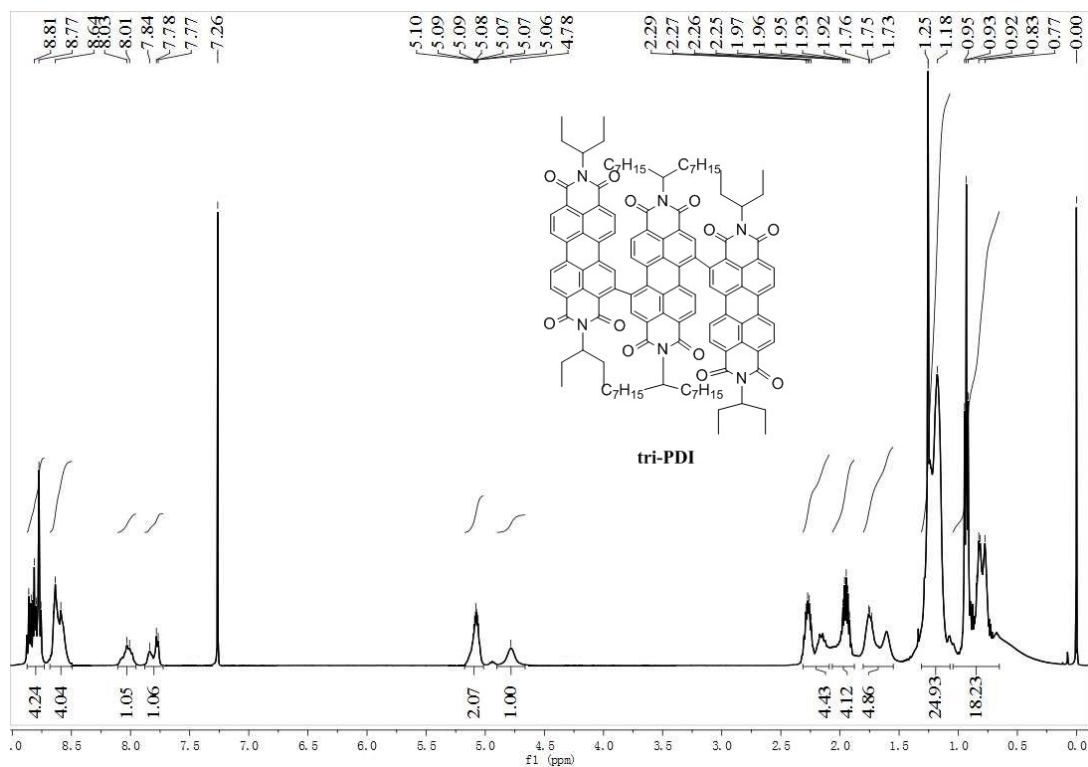

**Fig. S11** <sup>1</sup>H NMR spectrum of tri-PDI in CDCl<sub>3</sub>.

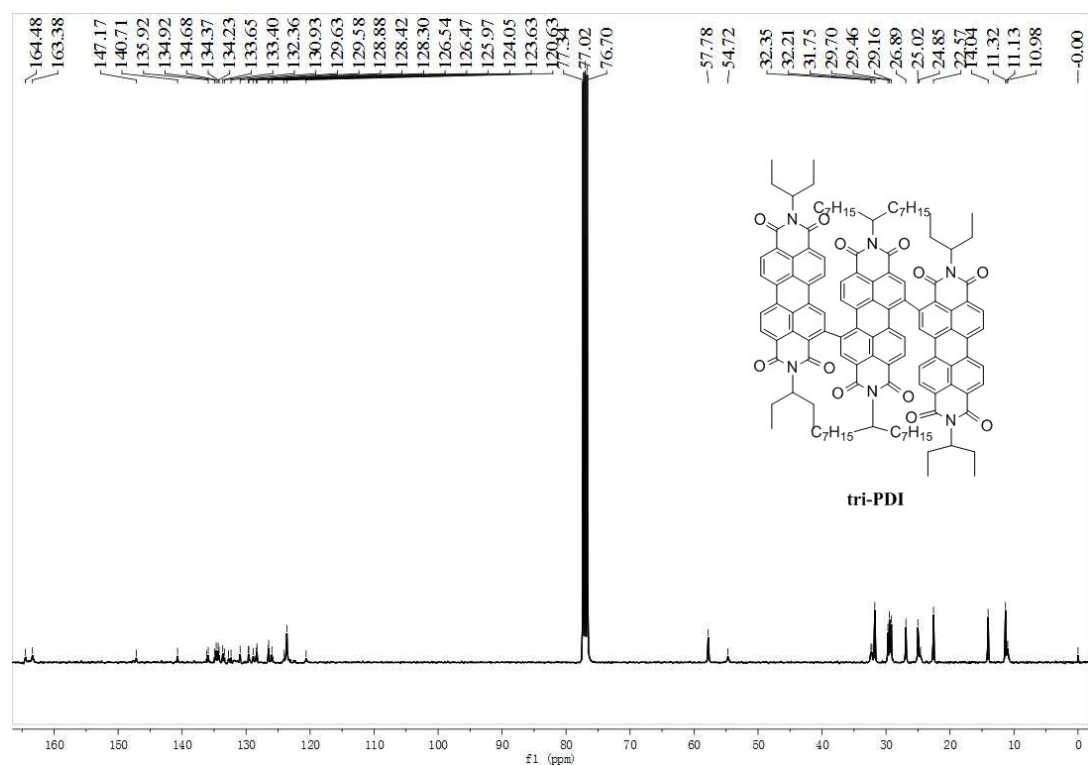

**Fig. S12** <sup>13</sup>C NMR spectrum of tri-PDI in CDCl<sub>3</sub>.
